# Supplementary material for: Low chorionic villous succinate accumulation associates with recurrent spontaneous abortion risk
Source: PubMed Central journal article supplement (PMC8187647; doi:10.1038/s41467-021-23827-0), 2021-06-08
Supplement: 41467_2021_23827_MOESM1_ESM.pdf [file 41467_2021_23827_MOESM1_ESM.pdf]

# **Supplementary Information**

**Low embryonic villous succinate  
accumulation associates with recurrent  
spontaneous abortion risk**

**Wang et al**

# Supplementary Figure 1

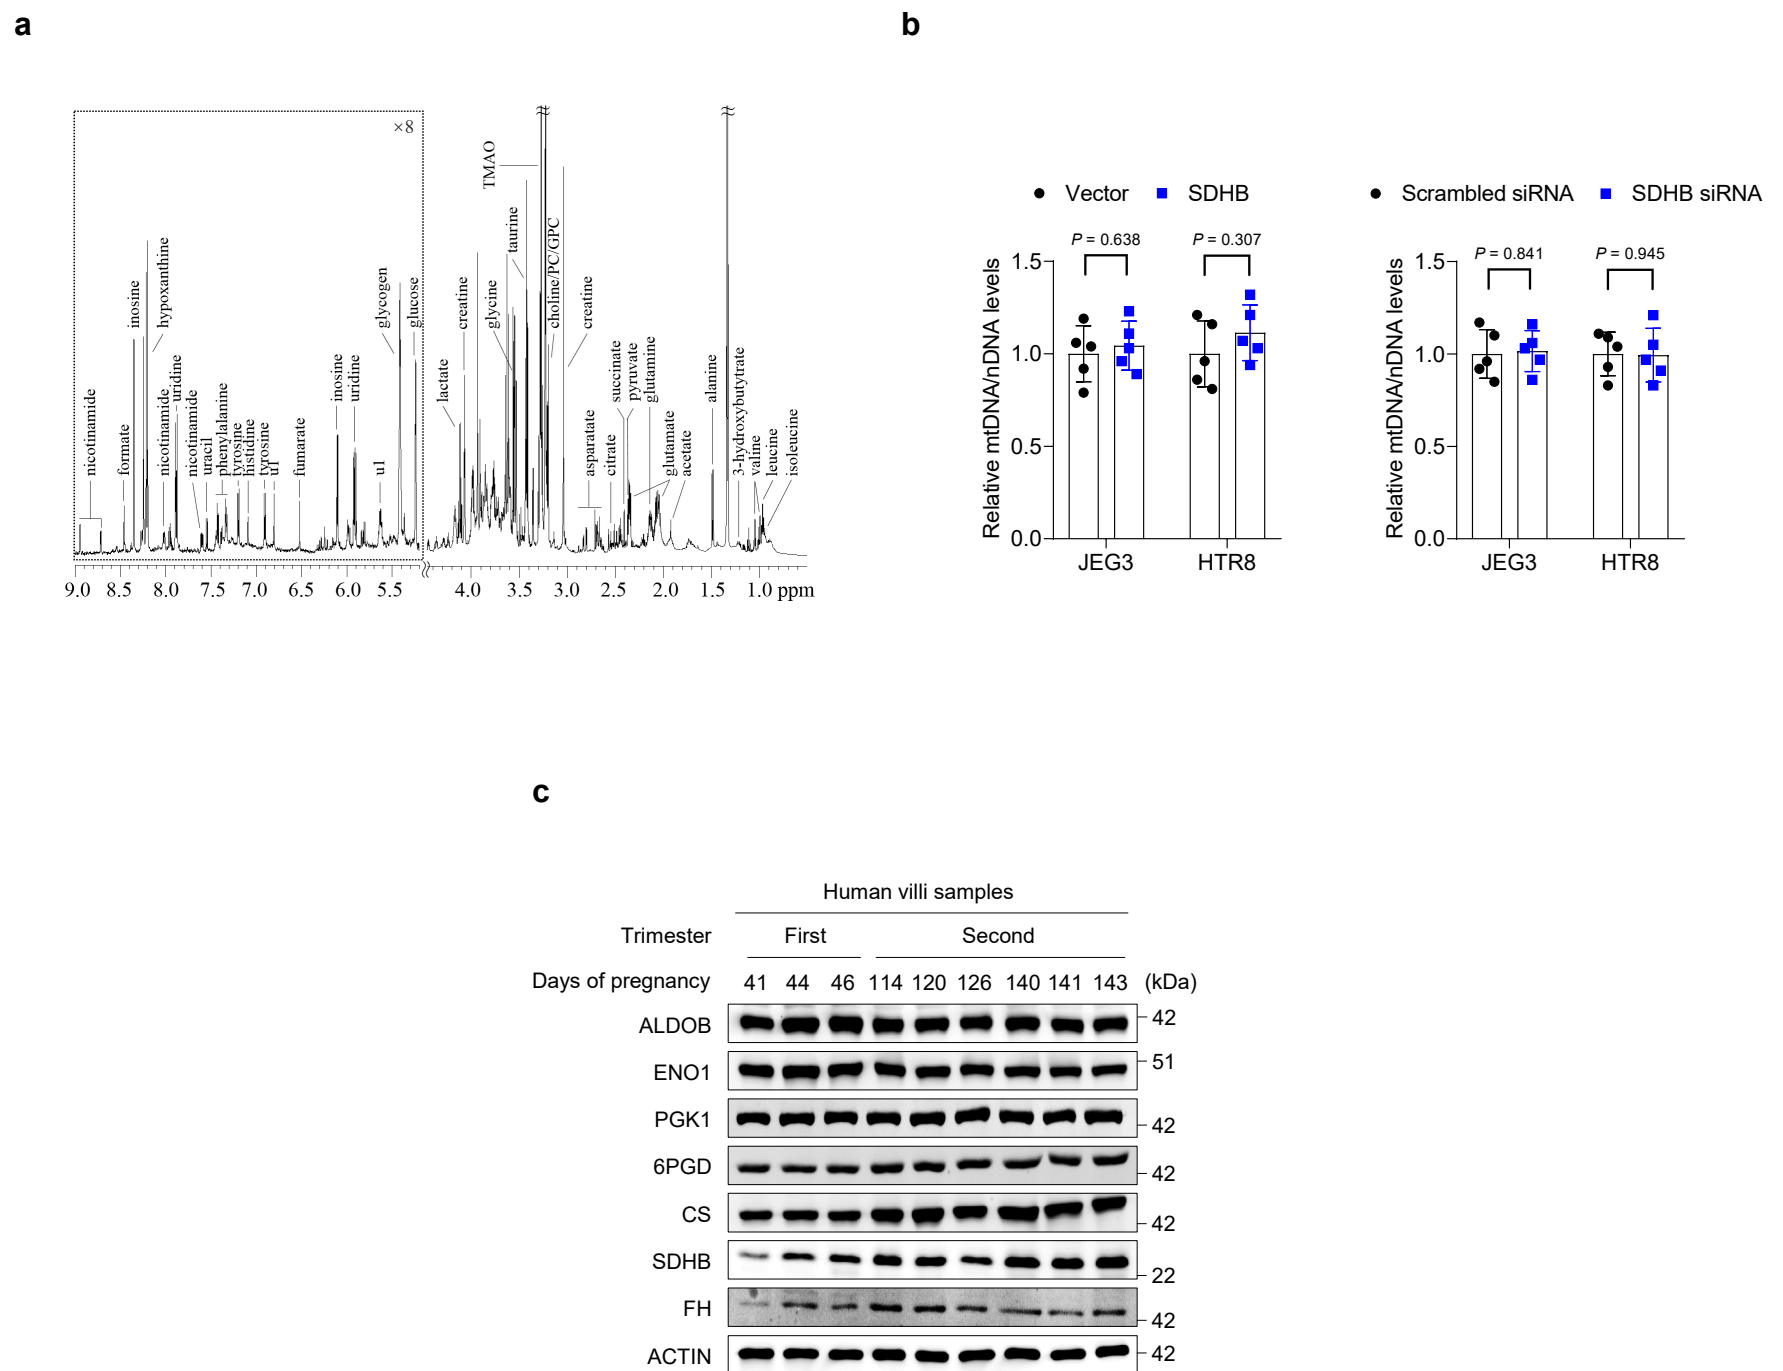

**Supplementary Figure 1. Metabolic profile in human villi samples.** **a** the two-dimensional (2D) NMR spectra of metabolites detected in human tissue samples. The NMR raw data are deposited in the BMRbig database (<https://bmrbig.org/released/bmrbig7>) with identifier “bmrbig7”. **b** Mitochondrial levels in cells with various treatments (n = 5 independent experiments). **c** Protein expression levels in villi samples from normal pregnant. **b** Data represent the mean  $\pm$  standard error. Two-tailed unpaired Student’s t-tests in **b**. Source data are provided as a Source Data file.

# Supplementary Figure 2

**a**

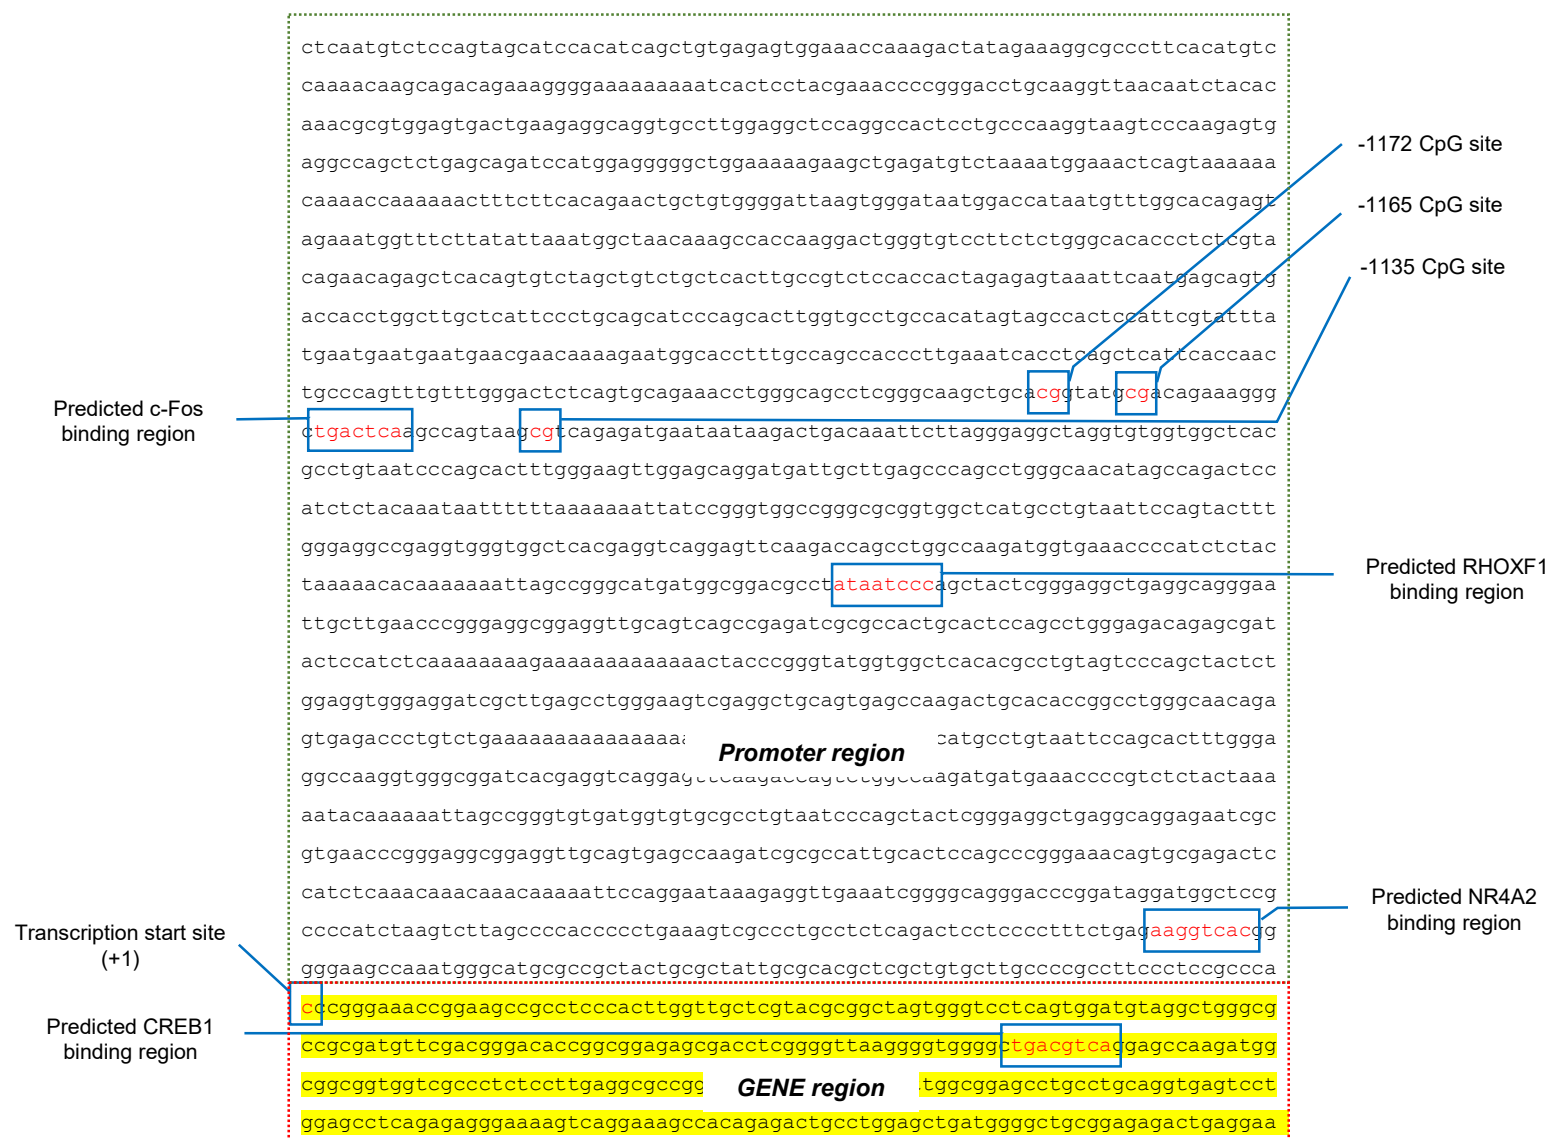

| Transcriptional factor | Score | Predicted site sequence |
|------------------------|-------|-------------------------|
| CREB1                  | 1.00  | tgactca                 |
| c-Fos                  | 1.00  | tgactca                 |
| NR4A2                  | 0.99  | aaggtcac                |
| RHOXF1                 | 0.99  | ataatccc                |

**b**

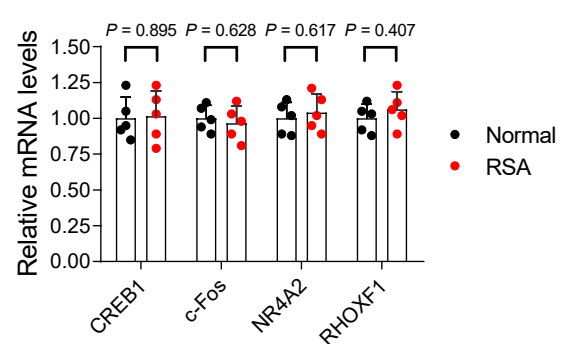

**c**

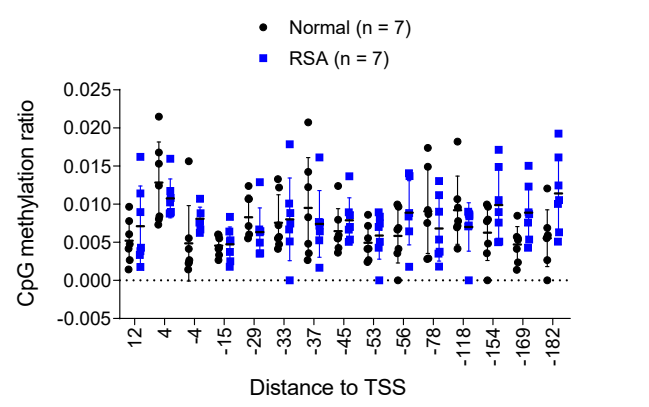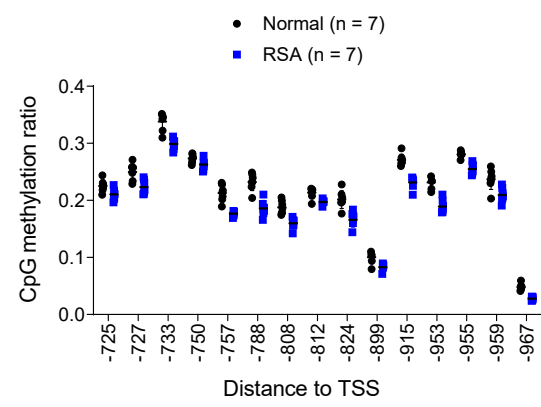

**d**

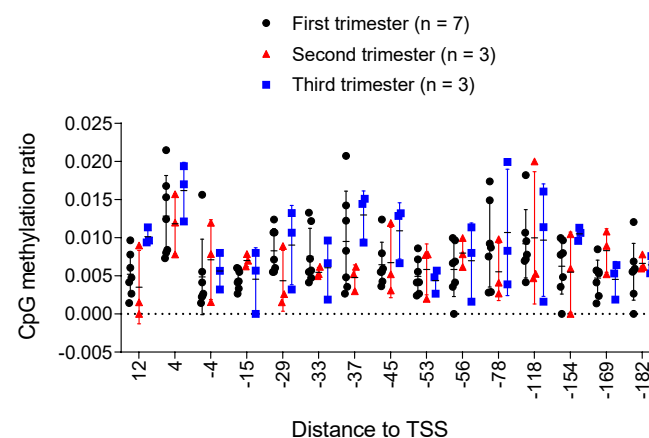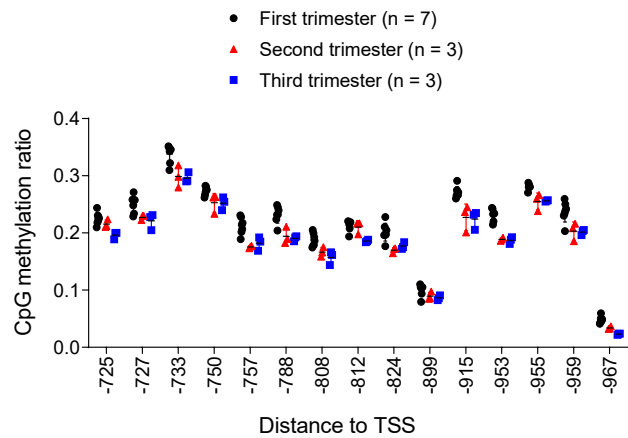

**Supplementary Figure 2. Annotation of SDHB promoter region.** **a** The -1172/-1165/-1135 CpG sites, and the predicted transcriptional factor binding sites, were indicated in the SDHB promoter. **b** The expression of transcriptional factors in villi samples from RSA patients (n = 5 biologically independent samples) and normal controls (n = 5 biologically independent samples). **c** Methylation levels of SDHB promoters in human villi samples. **b-d** Data represent the mean  $\pm$  standard error. Two-tailed unpaired Student's t-tests in **b**. Source data are provided as a Source Data file.

# Supplementary Figure 3

**a**

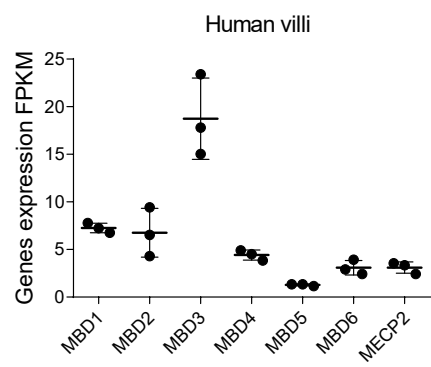

**b**

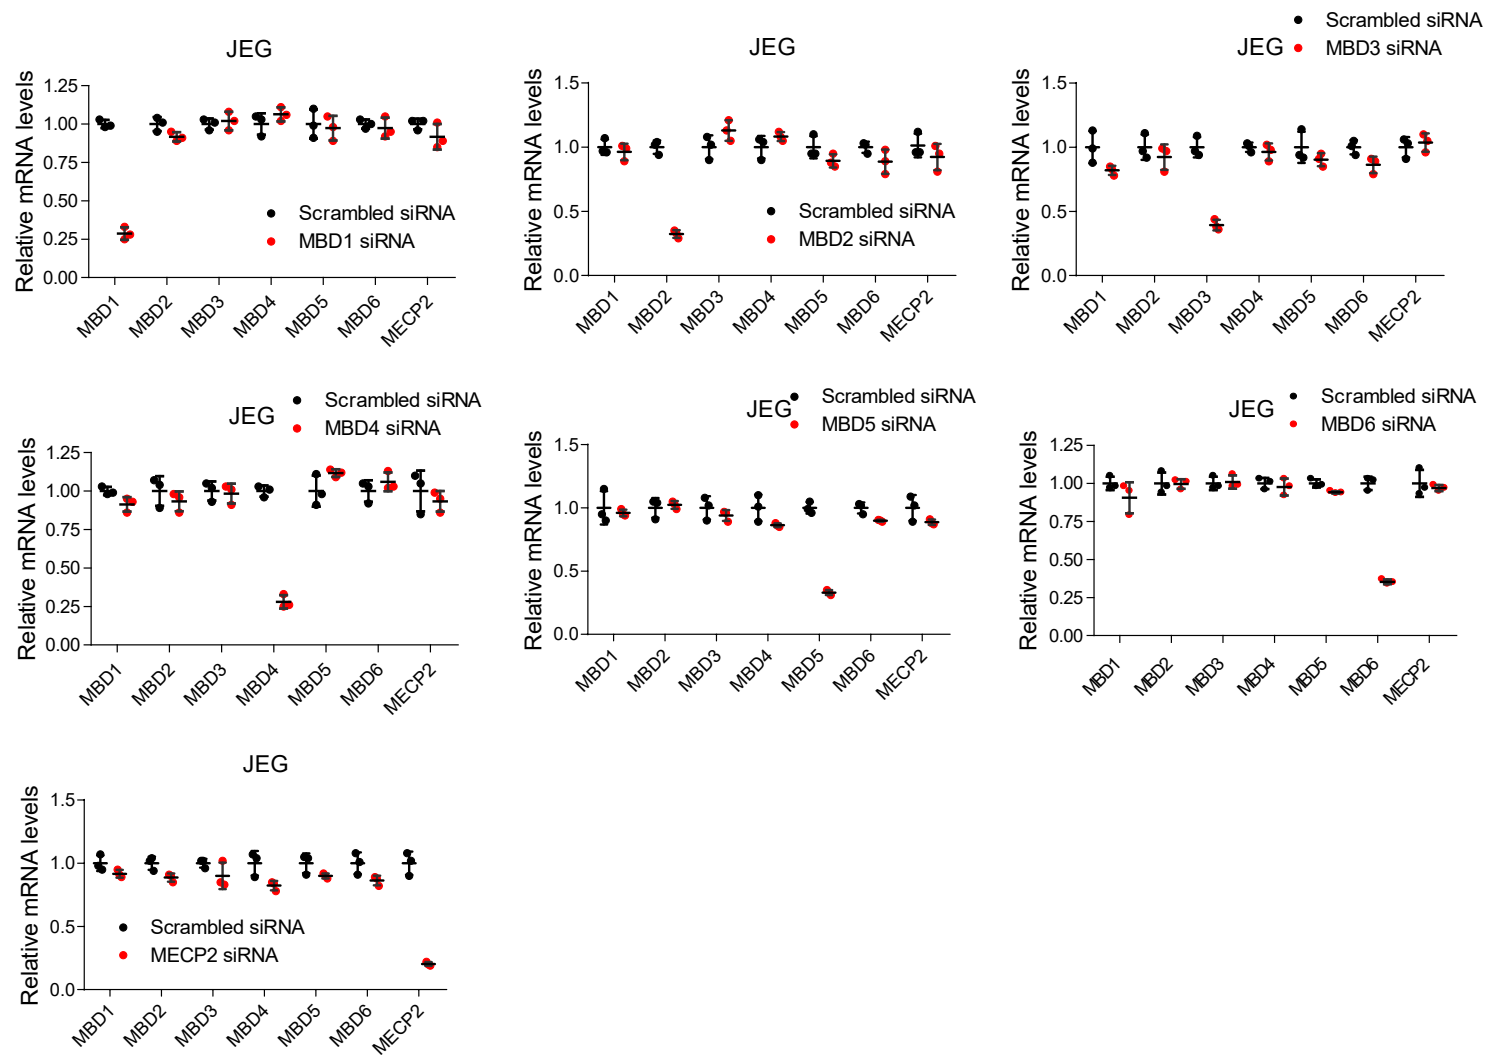

**c**

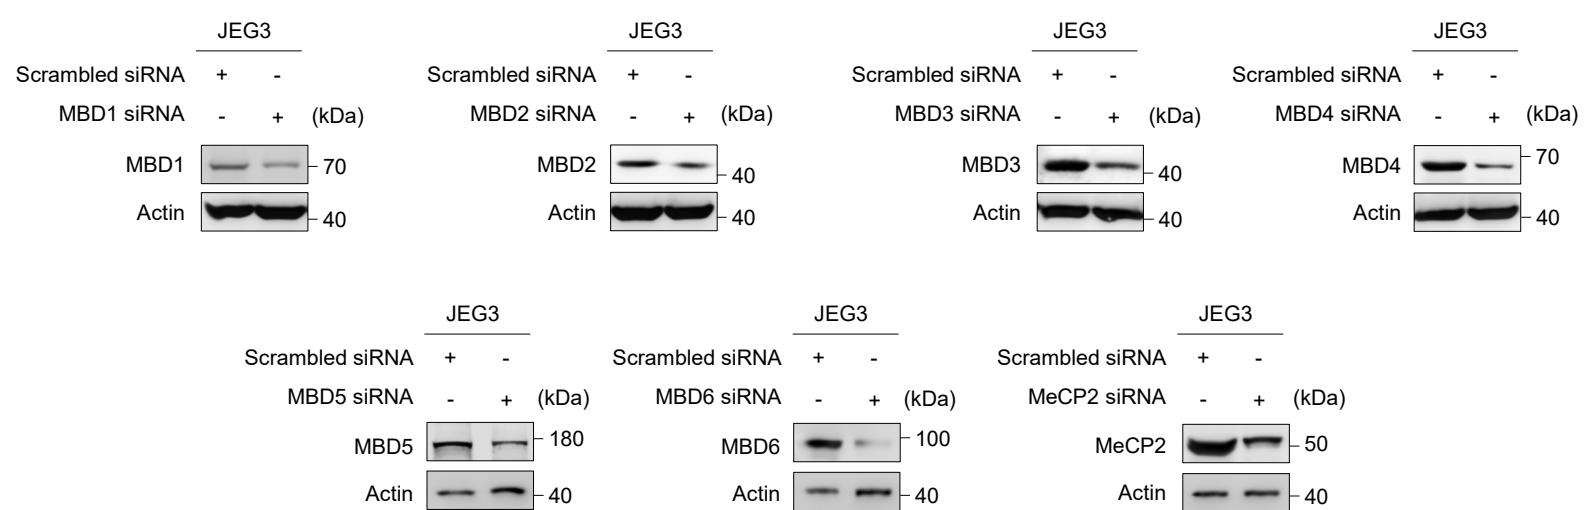

**Supplementary Figure 3.** The mRNA levels of methyl-CpG-binding proteins in villi from human normal pregnant (**a**) ( $n = 3$  biologically independent samples) and the knockdown efficiency of each methyl-CpG-binding protein in cultured JEG3 cells (**b**, **c**) (**b**,  $n = 3$  independent experiments). **a**, **b** Data represent the mean  $\pm$  standard error. Source data are provided as a Source Data file.

# Supplementary Figure 4

**a**

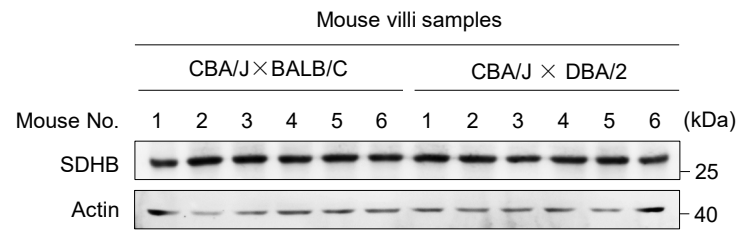

**b**

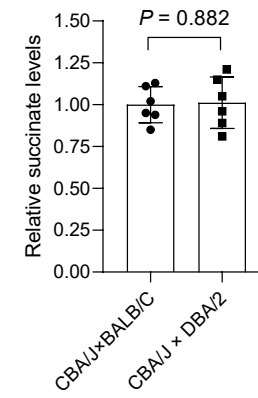

**Supplementary Figure 4.** The SDHB protein levels (**a**) and succinate levels (**b**) in villi (n = 6 biologically independent samples) from either CBA/J × BALB/C or CBA/J × DBA/2 mouse models (n = 5 biologically independent samples). **b** Data represent the mean ± standard error. ns not significant. Two-tailed unpaired Student's t-tests in **b**. Source data are provided as a Source Data file.

# Supplementary Figure 5

**a**

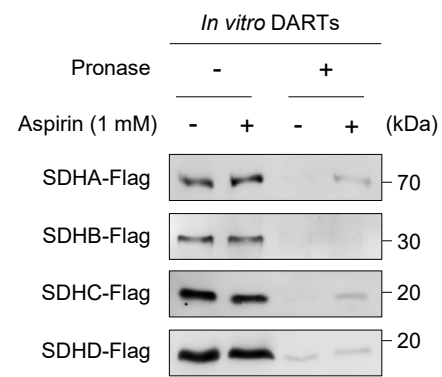

**b**

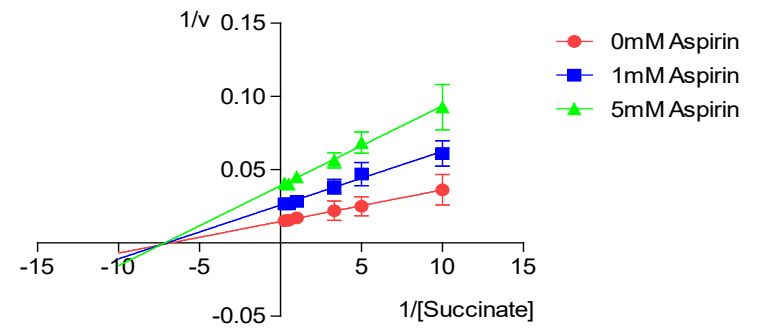

**c**

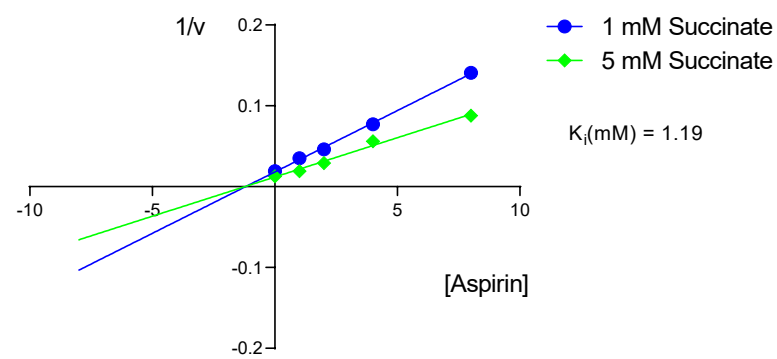

**d**

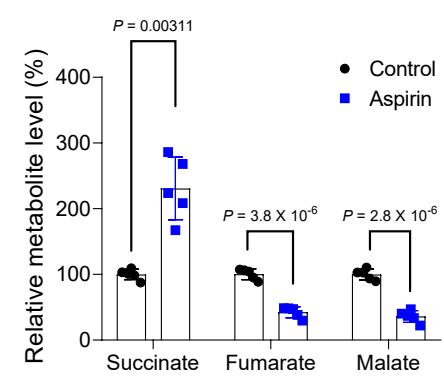

**Supplementary Figure 5. Aspirin accumulates succinate by inhibiting SDH. a** DARTs with aspirin confirms aspirin interacts with SDH components SDHA and SDHC. **b** Lineweaver-Burk plots showed that Aspirin uncompetitively inhibited SDH ( $n = 3$  independent experiments). **c** The inhibitory constant ( $K_i$ ) was calculated from a Dixon plot. **d** Relative levels of intracellular succinate, fumarate, and malate in JEG3 cells treated with or without 1 mM Aspirin. **b, d** Data represent the mean  $\pm$  standard error. Two-tailed unpaired Student's  $t$ -tests in **d**. Source data are provided as a Source Data file.

**Supplementary Table 1. Metabolite concentrations in decidua from individuals with RSA or normal controls**

| Metabolites ( $\mu\text{mol/g}$ ) | Normal (n = 29)   | RSA (n = 29)      | P value | Adjusted P value |
|-----------------------------------|-------------------|-------------------|---------|------------------|
| Glucose                           | 3.286 $\pm$ 0.965 | 3.071 $\pm$ 0.669 | 0.330   | 0.866            |
| Pyruvate                          | 0.279 $\pm$ 0.093 | 0.298 $\pm$ 0.089 | 0.437   | 0.866            |
| Lactate                           | 3.004 $\pm$ 1.158 | 2.932 $\pm$ 0.958 | 0.797   | 0.874            |
| Citrate                           | 0.263 $\pm$ 0.076 | 0.279 $\pm$ 0.071 | 0.426   | 0.866            |
| Succinate                         | 0.465 $\pm$ 0.111 | 0.501 $\pm$ 0.108 | 0.221   | 0.866            |
| Fumarate                          | 0.159 $\pm$ 0.06  | 0.166 $\pm$ 0.06  | 0.654   | 0.874            |
| Phenylalanine                     | 0.198 $\pm$ 0.053 | 0.207 $\pm$ 0.05  | 0.514   | 0.866            |
| Tyrosine                          | 0.189 $\pm$ 0.055 | 0.198 $\pm$ 0.055 | 0.524   | 0.866            |
| Asparatate                        | 1.404 $\pm$ 0.454 | 1.559 $\pm$ 0.404 | 0.177   | 0.866            |
| Glutamate                         | 1.908 $\pm$ 0.68  | 2.042 $\pm$ 0.672 | 0.455   | 0.866            |
| Glutamine                         | 2.654 $\pm$ 0.833 | 2.769 $\pm$ 0.727 | 0.579   | 0.866            |
| Glycine                           | 1.488 $\pm$ 0.564 | 1.538 $\pm$ 0.611 | 0.746   | 0.874            |
| Valine                            | 0.447 $\pm$ 0.099 | 0.46 $\pm$ 0.09   | 0.599   | 0.866            |
| Isoleucine                        | 0.251 $\pm$ 0.069 | 0.257 $\pm$ 0.06  | 0.730   | 0.874            |
| Leucine                           | 0.464 $\pm$ 0.13  | 0.481 $\pm$ 0.122 | 0.603   | 0.866            |
| Histidine                         | 0.136 $\pm$ 0.049 | 0.146 $\pm$ 0.04  | 0.374   | 0.866            |
| Alanine                           | 1.128 $\pm$ 0.268 | 1.116 $\pm$ 0.242 | 0.851   | 0.876            |
| Acetate                           | 0.281 $\pm$ 0.059 | 0.289 $\pm$ 0.067 | 0.610   | 0.866            |
| Formate                           | 0.419 $\pm$ 0.17  | 0.35 $\pm$ 0.145  | 0.106   | 0.866            |
| Inosine                           | 0.318 $\pm$ 0.151 | 0.338 $\pm$ 0.162 | 0.618   | 0.866            |
| Creatine                          | 1.019 $\pm$ 0.494 | 1.176 $\pm$ 0.647 | 0.302   | 0.866            |
| Hypoxanthine                      | 0.672 $\pm$ 0.283 | 0.721 $\pm$ 0.27  | 0.497   | 0.866            |
| Carnosine                         | 0.019 $\pm$ 0.012 | 0.019 $\pm$ 0.01  | 0.910   | 0.910            |
| Uridine                           | 0.37 $\pm$ 0.19   | 0.399 $\pm$ 0.188 | 0.564   | 0.866            |
| Taurine                           | 4.089 $\pm$ 1.612 | 4.207 $\pm$ 1.689 | 0.787   | 0.874            |
| 3-hydroxybutyrate                 | 0.308 $\pm$ 0.111 | 0.334 $\pm$ 0.154 | 0.459   | 0.866            |
| Nicotinamide                      | 0.126 $\pm$ 0.066 | 0.129 $\pm$ 0.065 | 0.839   | 0.876            |
| NAD                               | 0.016 $\pm$ 0.007 | 0.017 $\pm$ 0.009 | 0.409   | 0.866            |
| AMP                               | 0.009 $\pm$ 0.005 | 0.007 $\pm$ 0.004 | 0.420   | 0.866            |
| ADP                               | 0.016 $\pm$ 0.01  | 0.017 $\pm$ 0.009 | 0.756   | 0.874            |
| Uracil                            | 0.211 $\pm$ 0.066 | 0.228 $\pm$ 0.059 | 0.297   | 0.866            |

Data presented are given in  $\mu\text{mol/g}$  (mean  $\pm$  SD). P values were derived from unpaired two-sample *t* test (two groups have the same SD) or unpaired two-sample *t* test with Welch's correction (two groups do not have the equal SD) and then corrected by using the Benjamini & Hochberg method for multiple sampling (adjusted P value). Source data are provided as a Source Data file. NAD, Nicotinamide adenine dinucleotide; AMP, Adenosine monophosphate; ADP, Adenosine diphosphate.

**Supplementary Table 2. Genotyping of *SDHB* promoter region SNPs identified in normal pregnant women and RSA patients**

| SNP IN dbSNP | Position(base on db cDNA(NM_003000.3)) | Frequency in Normal Group |                |                     | Frequency in RSA Group |                |                     |
|--------------|----------------------------------------|---------------------------|----------------|---------------------|------------------------|----------------|---------------------|
|              |                                        | wild-type homozygosity    | heterozygosity | mutant homozygosity | wild-type homozygosity | heterozygosity | mutant homozygosity |
| rs2647209    | c.-2048A>G                             | 9/10                      | 0/10           | 1/10                | 19/20                  | 0/20           | 1/20                |
| rs3754509    | c.-1986A>G                             | 4/10                      | 1/10           | 5/10                | 10/20                  | 3/20           | 7/20                |
| rs202157870  | c.-1967delA                            | 10/10                     | 0/10           | 0/10                | 19/20                  | 0/20           | 1/20                |
| rs2746461    | c.-1425C>T                             | 9/10                      | 0/10           | 1/10                | 19/20                  | 0/20           | 1/20                |
| rs988711595  | c.-1028C>T                             | 10/10                     | 0/10           | 0/10                | 19/20                  | 0/20           | 1/20                |
| rs370466545  | c.-888A>G                              | 10/10                     | 0/10           | 0/10                | 19/20                  | 0/20           | 1/20                |
| rs148969634  | c.-561G>A                              | 10/10                     | 0/10           | 0/10                | 19/20                  | 0/20           | 1/20                |
| rs2647211    | c.-444C>T                              | 9/10                      | 0/10           | 1/10                | 19/20                  | 0/20           | 1/20                |
| NEW          | c.-216T>C                              | 10/10                     | 0/10           | 0/10                | 19/20                  | 0/20           | 1/20                |

The number of sequenced normal pregnant women is 10 and the number of RSA patients is 20. Frequency of homozygous or heterozygous SNPs is listed in terms of fractions.



**Supplementary Table 3. Primer sequence information**

| Name                  | Sequence (5'-3')                  | Purpose       |
|-----------------------|-----------------------------------|---------------|
| SDHB-forward (Xho I)  | CCCTCGAGATGGCGGCGGTGGTCGCACTCTCCT | Clone         |
| SDHB-reverse (EcoR I) | CGGAATTCAACTGAAGCTTTCTTCTCCTTATAG | Clone         |
| siMBD1(homo)          | GCTGTGAGAACTGTGGAAT               | siRNA Targets |
| siMBD2(homo)          | GCAAGGTACCTGGGAAATA               | siRNA Targets |
| siMBD3(homo)          | GCAGCTCCTCTGCAAACAA               | siRNA Targets |
| siMBD4(homo)          | GCAAAGAAGATGTTGCTAT               | siRNA Targets |
| siMBD5(homo)          | GCTTGGAATGTCCTTAT                 | siRNA Targets |
| siMBD6(homo)          | GCACAGAGCTGTCTTCCTT               | siRNA Targets |
| siMECP2(homo)         | AGAGAAAGAGGGCAAGCAT               | siRNA Targets |
| SDHB-KD               | CCGATTTGAGCAACTTCTATG             | shRNA Targets |
| VHL-KD                | GATCTGGAAGACCACCCAAAT             | shRNA Targets |
| PHD2-KD               | CTGTTATCTAGCTGAGTTCAT             | shRNA Targets |
| ACTB-Forward          | TCCCTGGAGAAGAGCTACG               | qRT-PCR       |
| ACTB-Reverse          | GTAGTTTCGTGGATGCCACA              | qRT-PCR       |
| HK1--Forward          | GCTCTCCGATGAACTCTCATAG            | qRT-PCR       |
| HK1--Reverse          | GGACCTTACGAATGTTGGCAA             | qRT-PCR       |
| GPI--Forward          | CAAGGACCGCTTCAACCACTT             | qRT-PCR       |
| GPI--Reverse          | CCAGGATGGGTGTGTTTGACC             | qRT-PCR       |
| TPI-Forward           | CTCATCGGCACTCTGAACG               | qRT-PCR       |
| TPI-Reverse           | GCGAAGTCGATATAGGCAGTAGG           | qRT-PCR       |
| PGK1-Forward          | TGGACGTTAAAGGGAAGCGG              | qRT-PCR       |
| PGK1-Reverse          | GCTCATAAGGACTACCGACTTGG           | qRT-PCR       |
| ENO1-Forward          | AAAGCTGGTGCCGTTGAGAA              | qRT-PCR       |
| ENO1-Reverse          | GGTTGTGGTAAACCTCTGCTC             | qRT-PCR       |
| PKM2-Forward          | ATGTCGAAGCCCCATAGTGAA             | qRT-PCR       |
| PKM2-Reverse          | TGGGTGGTGAATCAATGTCCA             | qRT-PCR       |
| 6PGD-Forward          | ATGGCCCAAGCTGACATCG               | qRT-PCR       |
| 6PGD-Reverse          | AAAGCCGTGGTCATTCATGTT             | qRT-PCR       |
| TKT-Forward           | TCCACACCATGCGCTACAAG              | qRT-PCR       |
| TKT-Reverse           | CAAGTCGGAGCTGATCTTCCT             | qRT-PCR       |
| PDHA1-Forward         | TGGTAGCATCCCGTAATTTTGC            | qRT-PCR       |
| PDHA1-Reverse         | ATTCGGCGTACAGTCTGCATC             | qRT-PCR       |
| CS-Forward            | TGCTTCTCCACGAATTTGAAA             | qRT-PCR       |
| CS-Reverse            | CCACCATACATCATGTCCACAG            | qRT-PCR       |
| IDH1-Forward          | TGTGGTAGAGATGCAAGGAGA             | qRT-PCR       |
| IDH1-Reverse          | TTGGTGACTTGGTCGTTGGTG             | qRT-PCR       |
| IDH2-Forward          | CGCCACTATGCCGACAAAAG              | qRT-PCR       |
| IDH2-Reverse          | ACTGCCAGATAATACGGGTCA             | qRT-PCR       |
| IDH3A-Forward         | CCCGCTGGATCTCTAAGG                | qRT-PCR       |
| IDH3A-Reverse         | AATTTCTGGGCCAATACCATCTC           | qRT-PCR       |
| OGDH-Forward          | GGCTTCCAGACTGTTAAGAC              | qRT-PCR       |

|                                                              |                                        |             |
|--------------------------------------------------------------|----------------------------------------|-------------|
| OGDH-Reverse                                                 | GCAGAATAGCACCGAATCTGTTG                | qRT-PCR     |
| SUCLA2-Forward                                               | TCTCCGTTCCCAAAGGATATGT                 | qRT-PCR     |
| SUCLA2-Reverse                                               | CACCAGCTAAAACCTGTGCC                   | qRT-PCR     |
| SDHA-Forward                                                 | CAAACAGGAACCCGAGGTTTT                  | qRT-PCR     |
| SDHA-Reverse                                                 | CAGCTTGGAACACATGCTGTAT                 | qRT-PCR     |
| SDHB-Forward                                                 | ACAGTCCCCGTATCAAGAAA                   | qRT-PCR     |
| SDHB-Reverse                                                 | GCATGATCTTCGGAAGGTCAA                  | qRT-PCR     |
| SDHC-Forward                                                 | CTGTTGCTGAGACACGTTGGT                  | qRT-PCR     |
| SDHC-Reverse                                                 | ACAGAGGACGGTTTGAACCTA                  | qRT-PCR     |
| FH-Forward                                                   | GGAGGTGTGACAGAACGCAT                   | qRT-PCR     |
| FH-Reverse                                                   | CATCTGCTGCCTTCATTATTGC                 | qRT-PCR     |
| MDH2-Forward                                                 | TCGGCCCAACAATGCTAAA                    | qRT-PCR     |
| MDH2-Reverse                                                 | GCGGCTTTGGTCTCGATGT                    | qRT-PCR     |
| SDHB Promoter<br>Region(-1165/-1172<br>CpG)( Non-methylated) | GGCAAGCTGCACGGTATGCGACAGAAAGGG         | EMSA        |
| SDHB Promoter<br>Region(-1165/-1172<br>CpG)( Methylated)     | GGCAAGCTGCAC(Me)GGTATGC(Me)GACAGAAAGGG | EMSA        |
| SDHB Promoter<br>Region(-1135<br>CpG)( Non-methylated)       | ACTCAAGCCAGTAAGCGTCAGAGATGAATA         | EMSA        |
| SDHB Promoter<br>Region(-1135<br>CpG)( Methylated)           | ACTCAAGCCAGTAAGC(Me)GTCAGAGATGAATA     | EMSA        |
| SDHB Promoter c-Fos<br>Binding Region                        | ACAGAAAGGGCTGACTCAAGCCAGTAAGCG         | EMSA        |
| SDHB Promoter<br>Region(-1165/-1172<br>CpG)( Non-methylated) | GGCAAGCTGCACGGTATGCGACAGAAAGGG         | EMSA        |
| SDHB-methyl-1F                                               | GAGTAATTAAGTGGGAGGyGGTTTT              | methylation |
| SDHB-methyl-1R                                               | AACTCCATCTCAAACAAACAACA                | methylation |
| SDHB-methyl-2F                                               | TTGTTTTTTAGGTTGGAGTGTAGTG              | methylation |
| SDHB-methyl-2R                                               | CAAAAATTCAAAACCAACCTAACC               | methylation |
| SDHB-methyl-3F                                               | GGTTAGGTTGGTTTTGAATTTTTG               | methylation |
| SDHB-methyl-3R                                               | ACTTAAACCCAACCTAAACAACATAA             | methylation |
| SDHB-methyl-4F                                               | TTATGTTGTTTAGGTTGGGTTTAAGT             | methylation |
| SDHB-methyl-4R                                               | CCCTTAAATCACCTCAACTCATTC               | methylation |
| SDHB-methyl-5F                                               | GAATGAGTTGAGGTGATTTTAAGGG              | methylation |
| SDHB-methyl-5R                                               | ACCAAAAATAAATATCCTTCTCTAAACA           | methylation |
| SDHB-Region1-F                                               | CGCCGCTACTGCGCTATT                     | ChIP-PCR    |
| SDHB-Region1-R                                               | CCTTGCCCTATGCTTCCT                     | ChIP-PCR    |
| SDHB-Region2-F                                               | ACAGTGGGAGACTCCATC                     | ChIP-PCR    |

|                                     |                            |                                      |
|-------------------------------------|----------------------------|--------------------------------------|
| SDHB-Region2-R                      | CGTCAGCCCCACCCCTTA         | ChIP-PCR                             |
| SDHB-Region3-F                      | CAGTGGCTCATGCCTGTAAT       | ChIP-PCR                             |
| SDHB-Region3-R                      | GGGGTGGGGCTAAGACTTAGA      | ChIP-PCR                             |
| SDHB-Region4-F                      | GGCGGACGCCTATAATCC         | ChIP-PCR                             |
| SDHB-Region4-R                      | CCACCTTGGCCTCCCAAAGT       | ChIP-PCR                             |
| SDHB-Region5-F                      | GGAAGTTGGAGCAGGATG         | ChIP-PCR                             |
| SDHB-Region5-R                      | GATGGAGTATCGCTCTGTCTC      | ChIP-PCR                             |
| SDHB-Region6-F                      | CTTTGCCAGCCACCCTTGA        | ChIP-PCR                             |
| SDHB-Region6-R                      | ACCTCGTGAGCCACCCACCT       | ChIP-PCR                             |
| SDHB-Region7-F                      | GGGATTAAGTGGGATAATGGA      | ChIP-PCR                             |
| SDHB-Region7-R                      | ACTGAGAGTCCCAAACAACT       | ChIP-PCR                             |
| 16S rRNA (mtDNA)-F                  | GCCTTCCCCCGTAAATGATA       | Mitochondrial Mass<br>Quantification |
| 16S rRNA (mtDNA)-R                  | TTATGCGATTACCGGGCTCT       | Mitochondrial Mass<br>Quantification |
| $\beta$ 2-microglobulin<br>(nDNA)-F | TGCTGTCTCCATGTTTGATGTAT    | Mitochondrial Mass<br>Quantification |
| $\beta$ 2-microglobulin<br>(nDNA)-R | TCTCTGCTCCCCACCTCTAAGT     | Mitochondrial Mass<br>Quantification |
| SDHB-1F                             | CACAAGACAGCCACGTGAATC      | Sanger Sequencing                    |
| SDHB-1R                             | CCAGTCCTTGGTGGCTTTGT       | Sanger Sequencing                    |
| SDHB-2F                             | GGGCTGGAAAAGAAGCTGAGAT     | Sanger Sequencing                    |
| SDHB-2R                             | CCTAGCCTCCCTAAGAATTTGTCAGT | Sanger Sequencing                    |
| SDHB-3F                             | CACCCTTGAATCACCTCAGCTC     | Sanger Sequencing                    |
| SDHB-3R1                            | TTCTCAGAAAGGGGAGGAGTCTGA   | Sanger Sequencing                    |
| SDHB-3R                             | GCAGTCTCTGTGGCTTTCCTGACTTT | Sanger Sequencing                    |
| SDHB-3SEQF                          | GGTATGGTGGCTCACACG         | Sanger Sequencing                    |
| SDHB-3SEQR                          | TTTTCAGACAGGGTCTCACTCT     | Sanger Sequencing                    |

**Supplementary Table 4. STROBE Statement—Checklist of items that should be included in reports of *case-control* studies**

|                              | <b>Item No</b> | <b>Recommendation</b>                                                                                                                                                                | <b>Page No</b> |
|------------------------------|----------------|--------------------------------------------------------------------------------------------------------------------------------------------------------------------------------------|----------------|
| <b>Title and abstract</b>    | 1              | (a) Indicate the study's design with a commonly used term in the title or the abstract                                                                                               | 2              |
|                              |                | (b) Provide in the abstract an informative and balanced summary of what was done and what was found                                                                                  | 2              |
| <b>Introduction</b>          |                |                                                                                                                                                                                      |                |
| Background/rationale         | 2              | Explain the scientific background and rationale for the investigation being reported                                                                                                 | 3-5            |
| Objectives                   | 3              | State specific objectives, including any prespecified hypotheses                                                                                                                     | 5              |
| <b>Methods</b>               |                |                                                                                                                                                                                      |                |
| Study design                 | 4              | Present key elements of study design early in the paper                                                                                                                              | 16-19          |
| Setting                      | 5              | Describe the setting, locations, and relevant dates, including periods of recruitment, exposure, follow-up, and data collection                                                      | 16             |
| Participants                 | 6              | (a) Give the eligibility criteria, and the sources and methods of case ascertainment and control selection. Give the rationale for the choice of cases and controls                  | 17-19          |
|                              |                | (b) For matched studies, give matching criteria and the number of controls per case                                                                                                  |                |
| Variables                    | 7              | Clearly define all outcomes, exposures, predictors, potential confounders, and effect modifiers. Give diagnostic criteria, if applicable                                             | 17-19          |
| Data sources/<br>measurement | 8*             | For each variable of interest, give sources of data and details of methods of assessment (measurement). Describe comparability of assessment methods if there is more than one group | 16-19          |
| Bias                         | 9              | Describe any efforts to address potential sources of bias                                                                                                                            | 18             |
| Study size                   | 10             | Explain how the study size was arrived at                                                                                                                                            | 16             |
| Quantitative variables       | 11             | Explain how quantitative variables were handled in the analyses. If applicable, describe which groupings were chosen and why                                                         | 17-18          |
| Statistical methods          | 12             | (a) Describe all statistical methods, including those used to control for confounding                                                                                                | 29-30          |
|                              |                | (b) Describe any methods used to examine subgroups and interactions                                                                                                                  | 29-30          |
|                              |                | (c) Explain how missing data were addressed                                                                                                                                          |                |
|                              |                | (d) If applicable, explain how matching of cases and controls was addressed                                                                                                          |                |
|                              |                | (e) Describe any sensitivity analyses                                                                                                                                                |                |

## Results

|                  |     |                                                                                                                                                                                                                                                                                                                                                                                                               |   |
|------------------|-----|---------------------------------------------------------------------------------------------------------------------------------------------------------------------------------------------------------------------------------------------------------------------------------------------------------------------------------------------------------------------------------------------------------------|---|
| Participants     | 13* | (a) Report numbers of individuals at each stage of study—eg numbers potentially eligible, examined for eligibility, confirmed eligible, included in the study, completing follow-up, and analysed<br>(b) Give reasons for non-participation at each stage<br>(c) Consider use of a flow diagram                                                                                                               | 5 |
| Descriptive data | 14* | (a) Give characteristics of study participants (eg demographic, clinical, social) and information on exposures and potential confounders<br>(b) Indicate number of participants with missing data for each variable of interest                                                                                                                                                                               | 5 |
| Outcome data     | 15* | Report numbers in each exposure category, or summary measures of exposure                                                                                                                                                                                                                                                                                                                                     | 5 |
| Main results     | 16  | (a) Give unadjusted estimates and, if applicable, confounder-adjusted estimates and their precision (eg, 95% confidence interval). Make clear which confounders were adjusted for and why they were included<br>(b) Report category boundaries when continuous variables were categorized<br>(c) If relevant, consider translating estimates of relative risk into absolute risk for a meaningful time period | 5 |
| Other analyses   | 17  | Report other analyses done—eg analyses of subgroups and interactions, and sensitivity analyses                                                                                                                                                                                                                                                                                                                |   |

## Discussion

|                  |    |                                                                                                                                                                            |       |
|------------------|----|----------------------------------------------------------------------------------------------------------------------------------------------------------------------------|-------|
| Key results      | 18 | Summarise key results with reference to study objectives                                                                                                                   | 13    |
| Limitations      | 19 | Discuss limitations of the study, taking into account sources of potential bias or imprecision. Discuss both direction and magnitude of any potential bias                 | 14    |
| Interpretation   | 20 | Give a cautious overall interpretation of results considering objectives, limitations, multiplicity of analyses, results from similar studies, and other relevant evidence | 13-15 |
| Generalisability | 21 | Discuss the generalisability (external validity) of the study results                                                                                                      | 15    |

## Other information

|         |    |                                                                                                                                                               |    |
|---------|----|---------------------------------------------------------------------------------------------------------------------------------------------------------------|----|
| Funding | 22 | Give the source of funding and the role of the funders for the present study and, if applicable, for the original study on which the present article is based | 30 |
|---------|----|---------------------------------------------------------------------------------------------------------------------------------------------------------------|----|

\*Give information separately for cases and controls.

**Note:** An Explanation and Elaboration article discusses each checklist item and gives methodological background and published examples of transparent reporting. The STROBE checklist is best used in conjunction with this article (freely available on the Web sites of PLoS Medicine at

<http://www.plosmedicine.org/>, *Annals of Internal Medicine* at <http://www.annals.org/>, and *Epidemiology* at <http://www.epidem.com/>). Information on the STROBE Initiative is available at <http://www.strobe-statement.org>.
